# Supplementary material
Source: Springer Nature journal article supplement (https://www.springermedizin.de/resource/supplementary/13052_2008_9_MOESM4_ESM.pdf/9671272)

ICER Palivizumab versus absence of prophylaxis

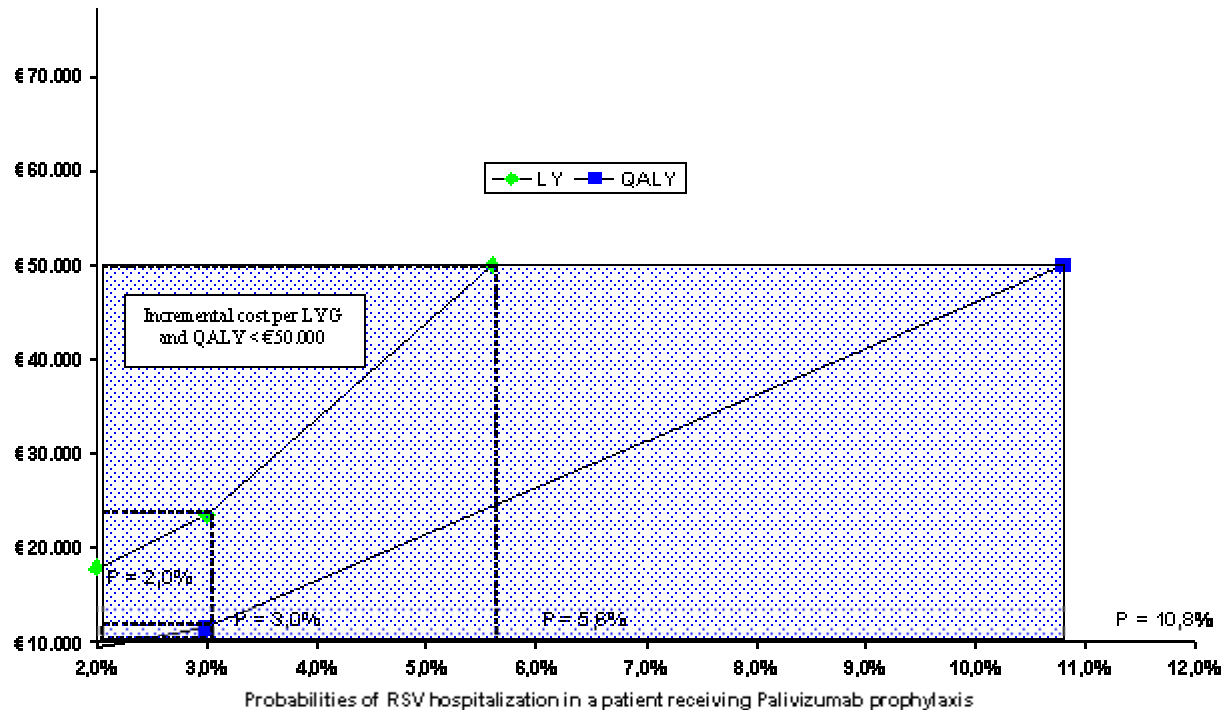

Supplement: MOESM4 [file 9671272]
